# Supplementary material
Source: Springer Nature journal article supplement (https://www.springermedizin.de/resource/supplementary/13024_2012_354_MOESM7_ESM.pdf/9643800)
Supplement: MOESM7 [file 9643800]

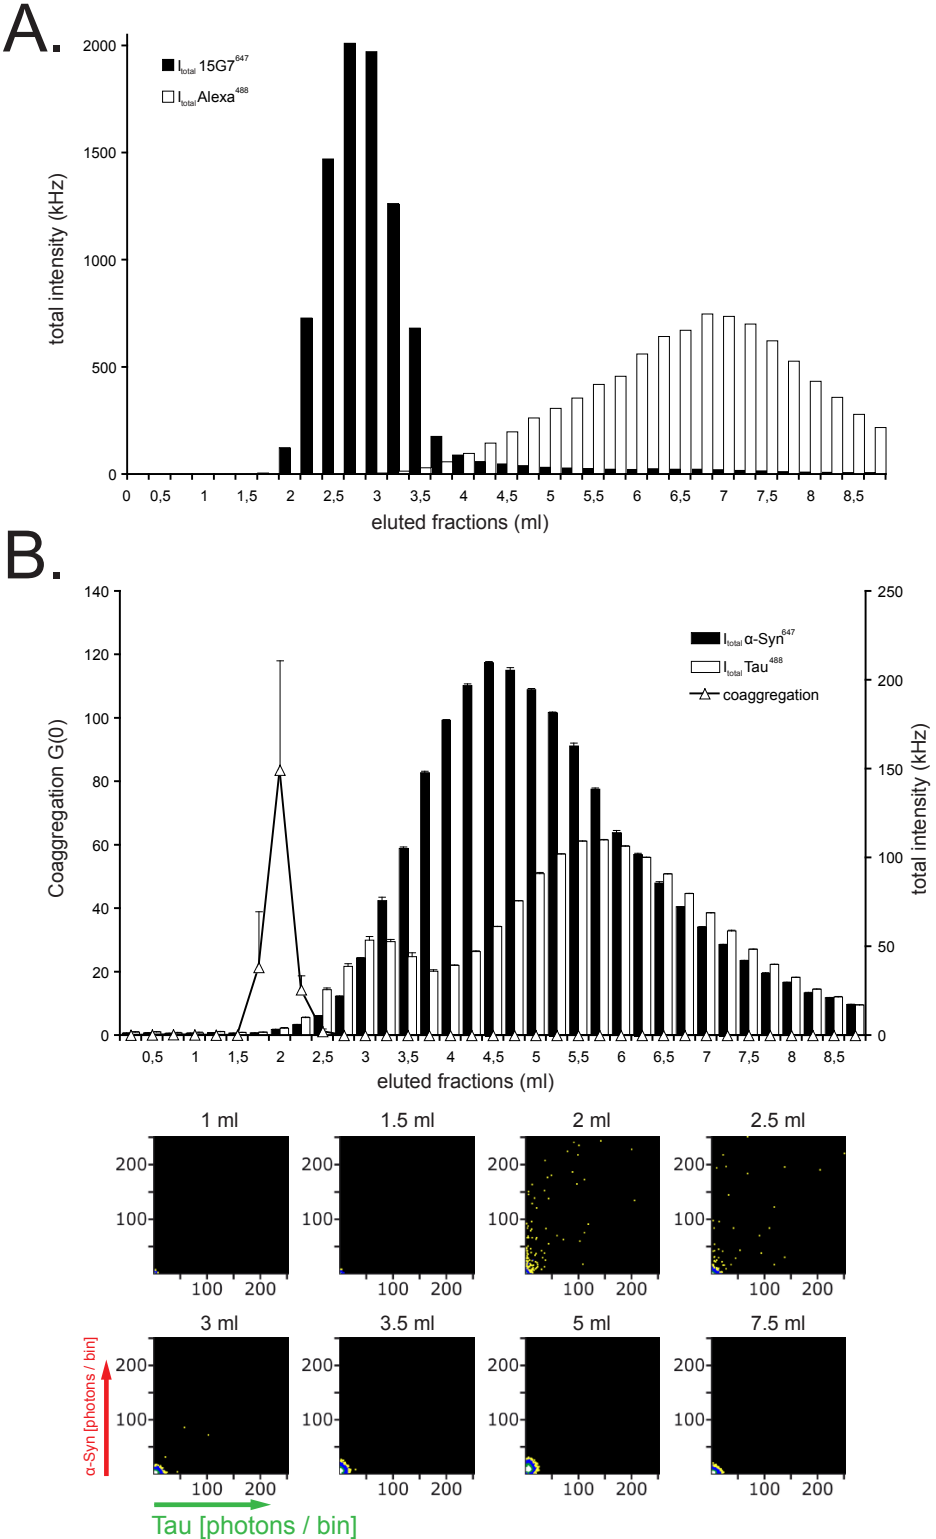

**supp. figure 3:** Mixed tau and  $\alpha\text{-Syn}$  coaggregates can be separated from protein monomers by gel filtration. A. Gel filtration of fluorescently labeled IgG antibody  $15G7^{647}$  (~160 kDa) and Alexa<sup>488</sup> fluorescent dye (0.64 kDa). A mixture containing antibody and dye was loaded onto a PD-10 gel filtration column (Invitrogen) and eluted in fractions of 0.25 ml. Fractions were then measured by SIFT. Proteins and dye are eluted in descending order according to their molecular weight. B. Tau<sup>488</sup> and  $\alpha\text{-Syn}^{647}$  were coincubated in presence of 100  $\mu\text{M}$   $\text{Al}^{3+}$  for one hour at room temperature and then loaded onto a PD-10 column. The eluate was collected in fractions of 0.25 ml in sample tubes containing 5  $\mu\text{l}$  of a 10% SDS solution (final concentration 0.1%) to prevent protein adhesion to the sample tube. Cross-correlation amplitudes and SIFT-2D histograms show the presence of SDS-stable mixed oligomers that elute as a well-defined peak before the elution of monomers, as indicated by increases in total fluorescence intensity.
